# Supplementary material
Source: publisher figshare collection journal article supplement (https://gsajournals.figshare.com/ndownloader/files/25833968)
Supplement: Supplementary file 1 [file 25833968]

**Figure S4.** The v. 4 reference assembly and the Paxton Lake *de nevo* assembly are highly collinear. Both genomes were aligned using nucmer. Alignments are only shown if they exceed 98% sequence identity and had an alignment length of at least 4000 bp.
